# Supplementary material
Source: ML conference proceedings conference paper supplement (https://openreview.net/forum?id=MCUMob451I)

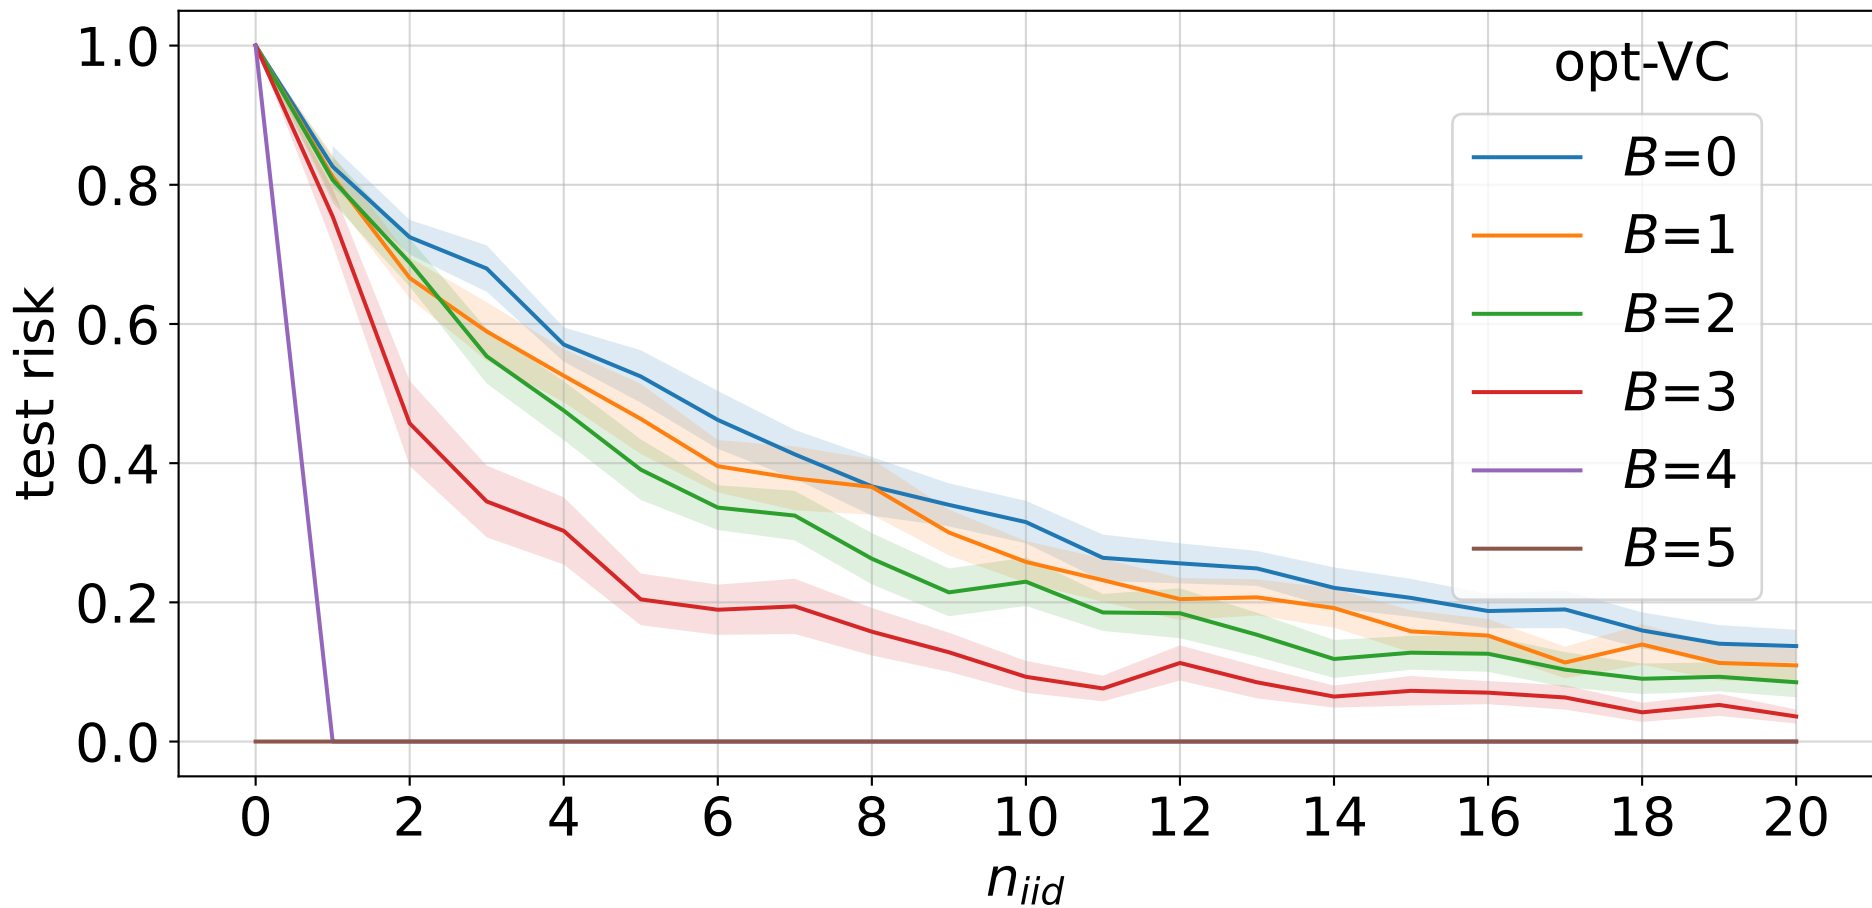

Supplement: supplementary_material [file budget_comparison_by_n_env.pdf › Nurture-then-Nature/code/output/runs/11/budget_comparison_by_n_env.pdf]

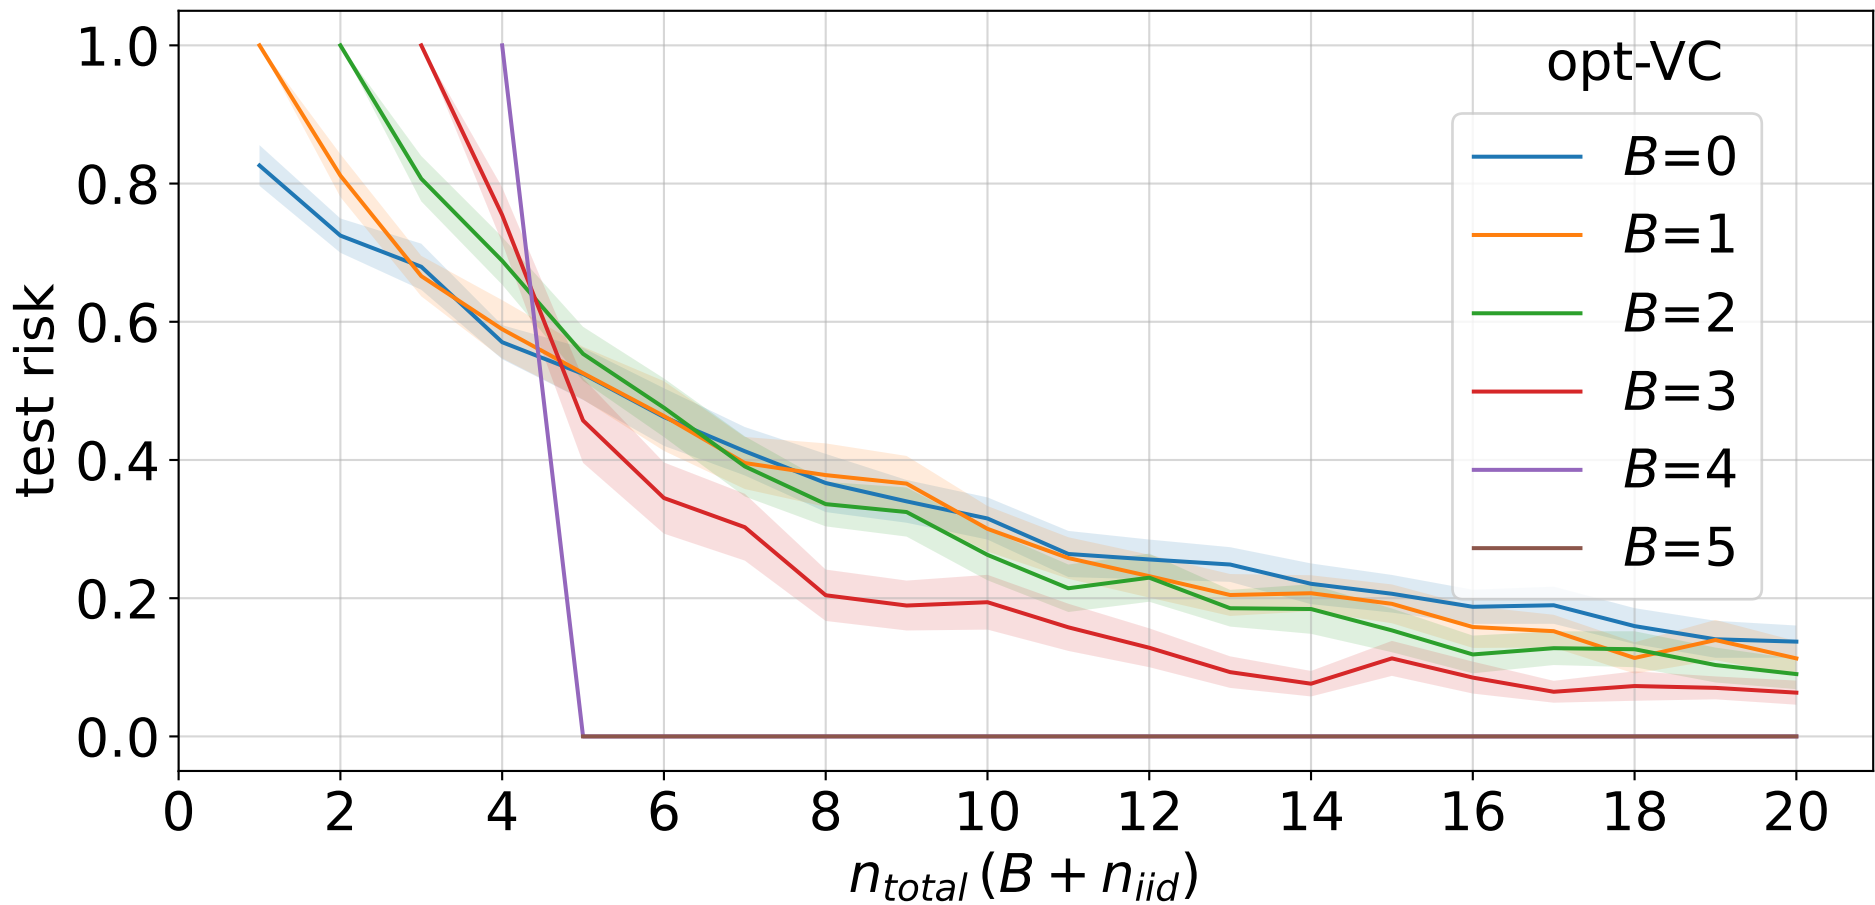

Supplement: supplementary_material [file budget_comparison_by_n_total.pdf › Nurture-then-Nature/code/output/runs/11/budget_comparison_by_n_total.pdf]

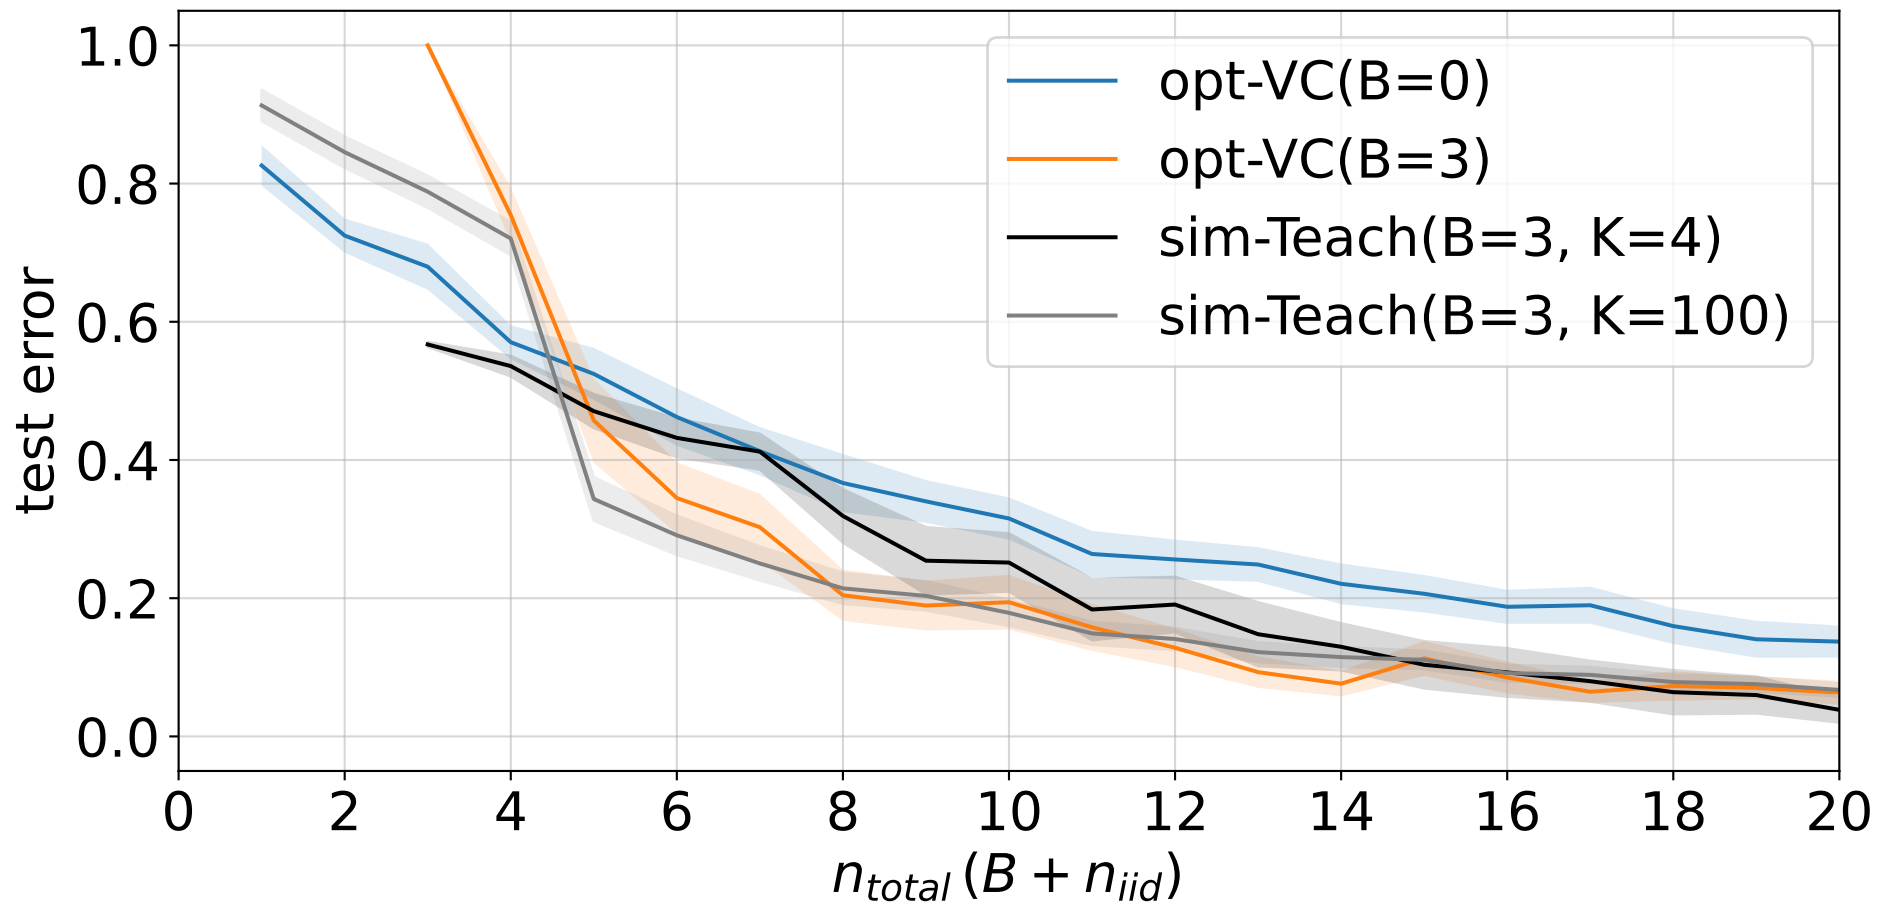

Supplement: supplementary_material [file budget_comparison_by_n_total_with_baseline.pdf › Nurture-then-Nature/code/output/runs/11/budget_comparison_by_n_total_with_baseline.pdf]

Performance Comparison (d=4)

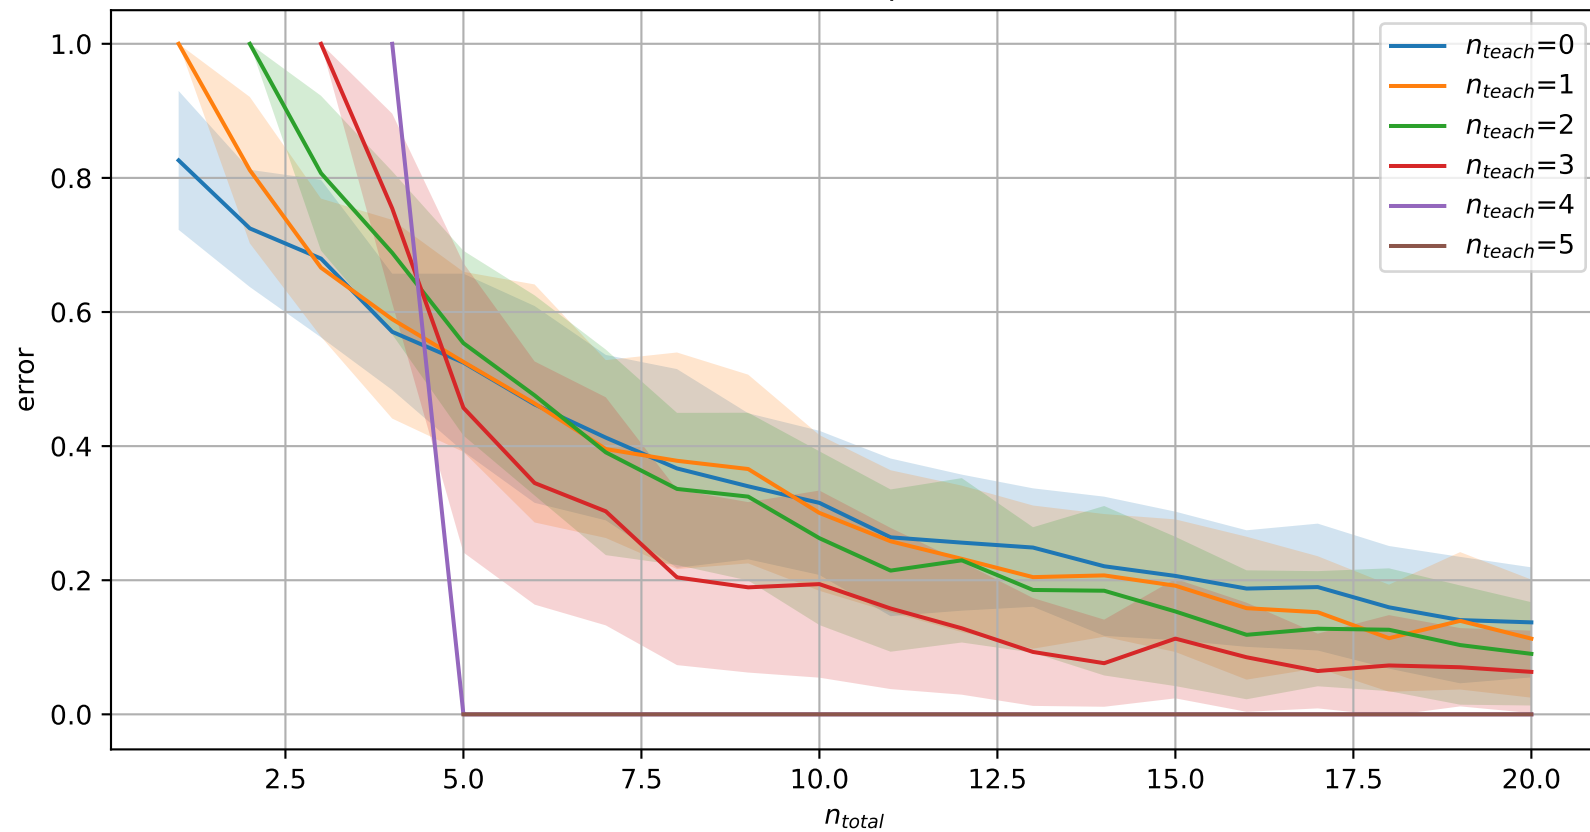

Supplement: supplementary_material [file budget_comparison_plot.pdf › Nurture-then-Nature/code/output/runs/11/budget_comparison_plot.pdf]

Performance Comparison (d=4)

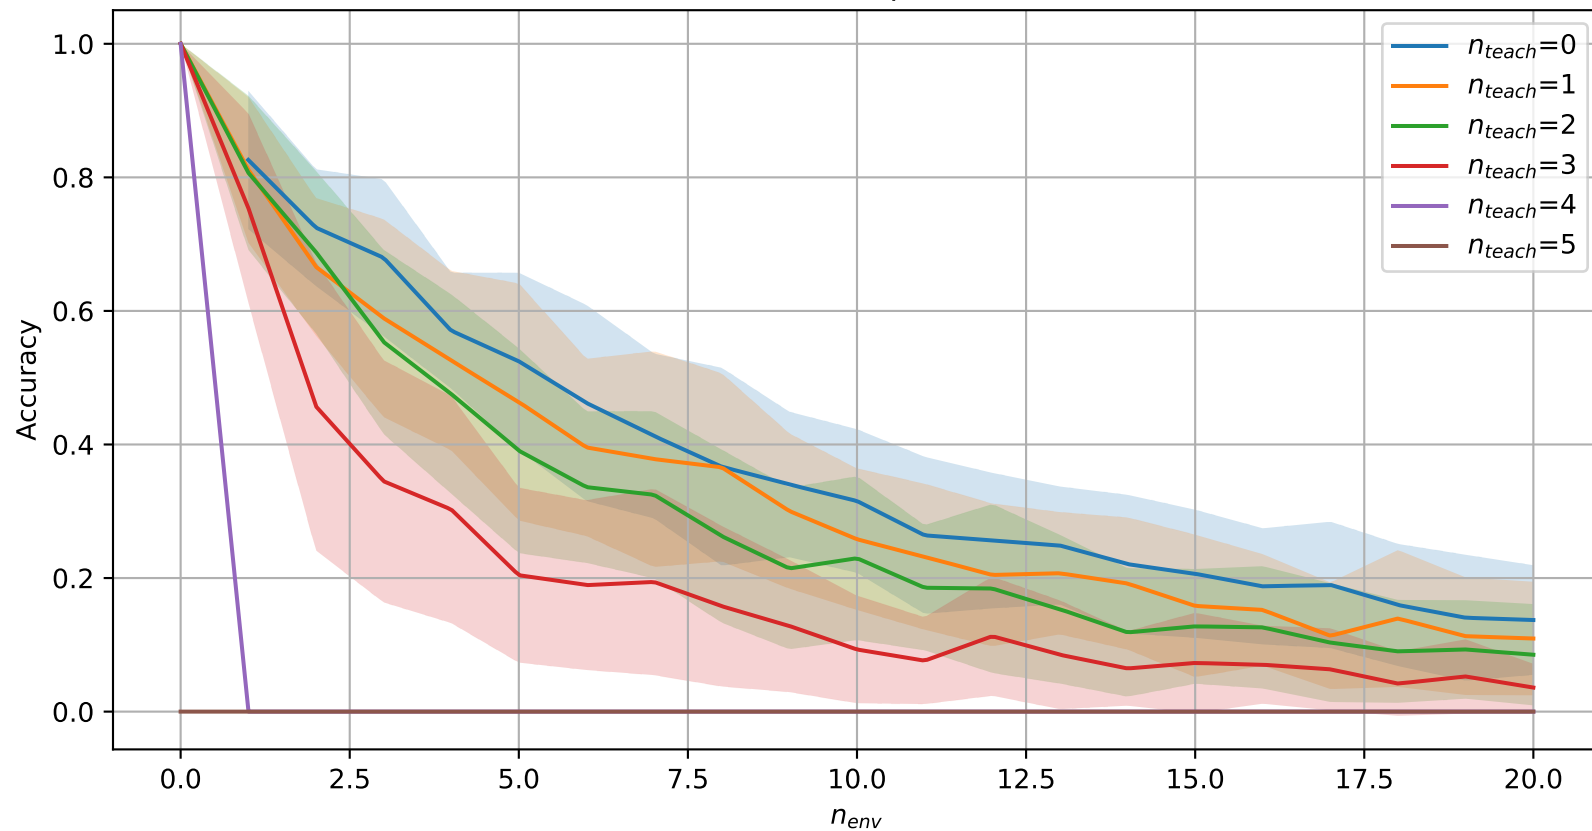

Supplement: supplementary_material [file nurture_nature.pdf › Nurture-then-Nature/code/output/runs/11/nurture_nature.pdf]

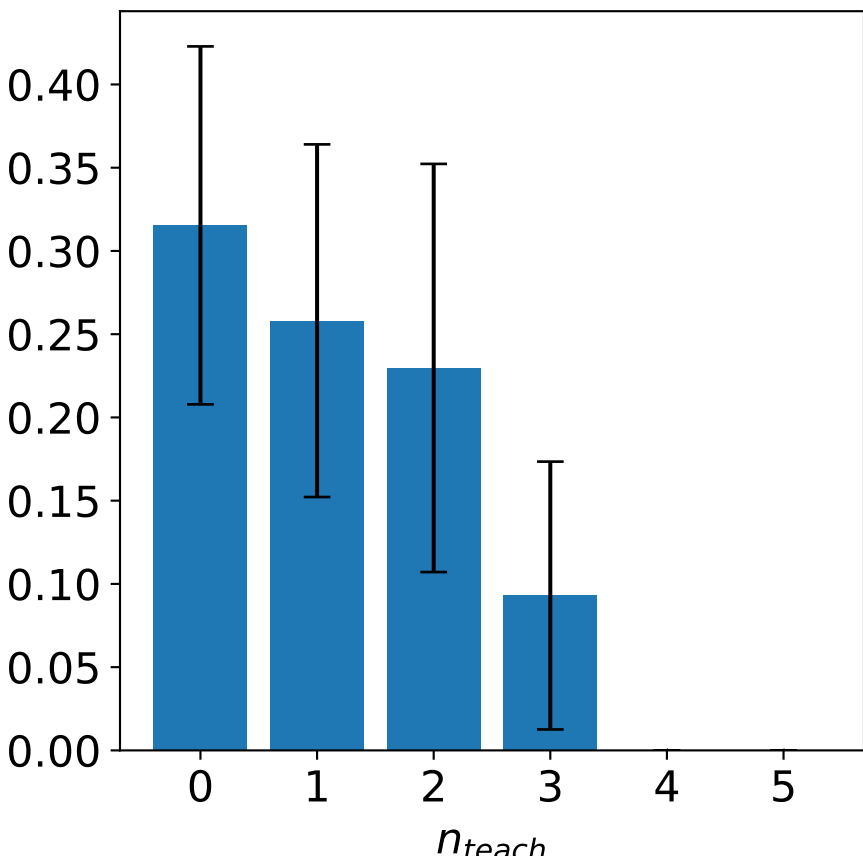

Supplement: supplementary_material [file teach_vs_no_teach_bar_plot.pdf › Nurture-then-Nature/code/output/runs/11/teach_vs_no_teach_bar_plot.pdf]

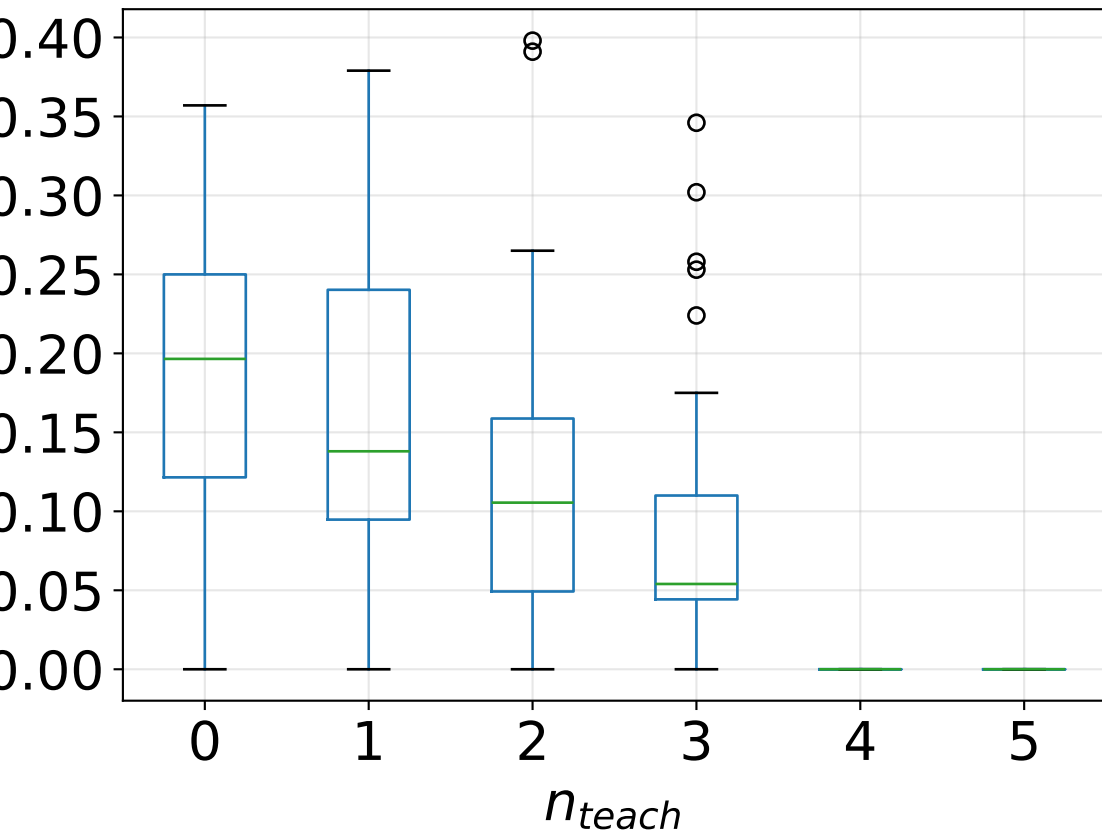

Supplement: supplementary_material [file teach_vs_no_teach_box_plot.pdf › Nurture-then-Nature/code/output/runs/11/teach_vs_no_teach_box_plot.pdf]
